# Supplementary material
Source: PubMed Central journal article supplement (PMC2812043)
Supplement: fj.09-133223_1.pdf [file fj.09-133223_1.pdf]

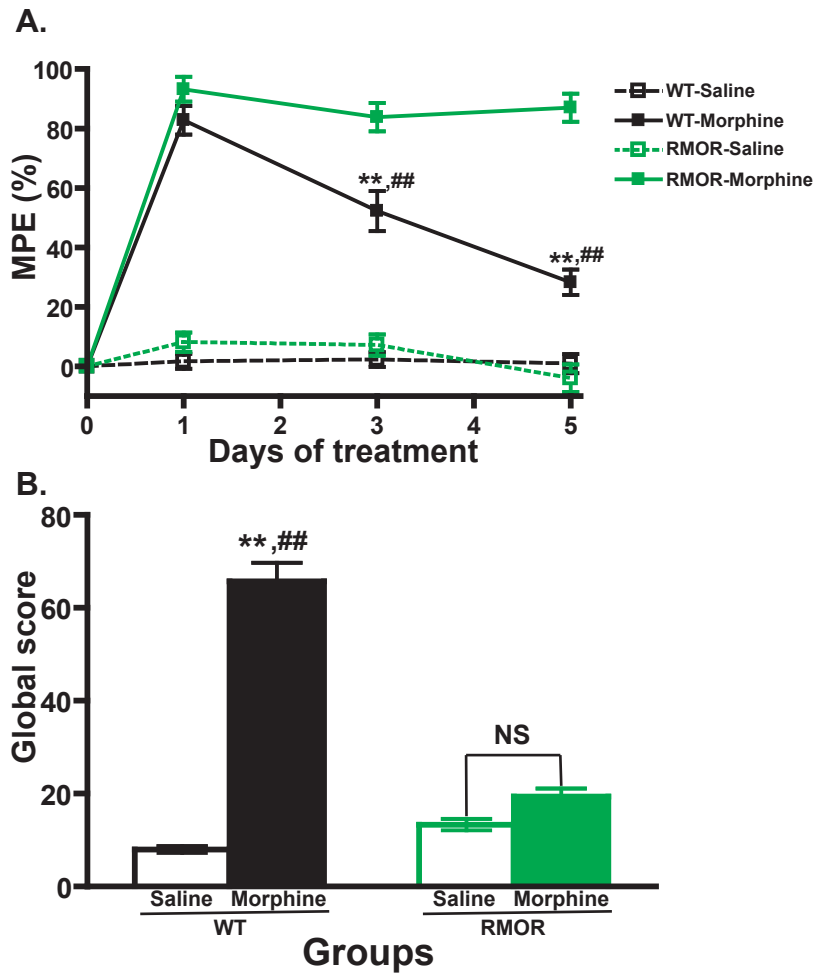

**Supplemental Figure 1: Tolerance to and dependence on morphine in WT and RMOR mice.** (A) Antinociceptive responses were measured with the hot-plate response latency test (56° C) 30 min after saline or morphine treatment (10 mg/kg, s.c.). A response endpoint was defined as latency to either lick the fore- or hindpaws or flick the hindpaws. Data are reported as the mean ± SEM of percent maximum possible effect (MPE) by using the following formula:  $100\% \times \frac{[(\text{drug response time} - \text{basal response time}) / (\text{cut-off time} - \text{basal response time})]}$ . WT mice developed substantial tolerance after 5 days of morphine treatment (n= 19), whereas RMOR mice, treated with the same protocol show no tolerance to morphine (n= 16), (\*\* p < 0.01: WT- morphine, day 3 and 5 vs day 1; ### p < 0.01: WT-morphine vs RMOR-morphine). (B) Mice from (A) were injected with naloxone (2 mg/kg, s.c.) after the hot-plate assay on day 5 and withdrawal signs were monitored. WT mice treated with chronic morphine showed significantly more withdrawal than RMOR mice (\*\* p < 0.01: WT- morphine (n= 16) vs WT-saline (n= 9); ### p < 0.01: WT- morphine vs RMOR-morphine (n=16) by one way ANOVA followed by Newman-Keuls post-test).
